# Supplementary material
Source: publisher figshare collection journal article supplement (https://sage.figshare.com/ndownloader/files/16986623)
Supplement: Supplementary file 1 [file 16986623]

**Appendix 1: Operational definition and categorize of maternal health care use indicators included in the study**

| **Categorize** | **Description** |
| --- | --- |
| Fair Adequate antenatal care | Includes women who received care in the first trimester and had four or more visits and had received fair ANC content (more than 70% of ANC items provided). |
| Poor antenatal care adequacy | Includes women who didn’t receive care in the first trimester or/and who had less than four ANC visits or/and had poor ANC content (less than 70% of ANC items provided) |
| Missing antenatal care cases | Includes women who were not able to recall or had unrecorded information about the month of the beginning of pregnancy or number of antenatal visits or ANC items provided. |
| No antenatal care | Includes women who received no antenatal care. |
| Skill birth attendance | Includes deliveries in the two years preceding to the survey were attended by a medical trained staff, defined as a doctor, nurse or midwife. |
| Facility Based Deliveries | Includes births that occurred in a public health facility (public hospital, public health center, public maternity center, health unit) or a private health facility (private hospital/clinic, other cooperative hospital/clinic) |
| Home delivery with trained providers | Includes cases that give birth in home place ether planned or unplanned that attended by a medical trained staff. |
| Home delivery without trained providers | Includes cases that give birth to a baby in a home place. Ether planned or unplanned home birth. That not attended by a medical trained staff. |
| Contraceptive usage | It refers to women, who are currently using, at least one method of contraception, regardless of the method used. It is usually reported for married women aged 15 to 49. |
| Unmet need for contraception | It refers to currently married fecund women who are not using any method of contraception, but who wish to postpone the next birth or who wish to stop childbearing altogether |
